# Supplementary material
Source: PubMed Central journal article supplement (PMC9910102)
Supplement: NIHMS1860120-supplement-1.pdf [file NIHMS1860120-supplement-1.pdf]

**Figure S1. Supplemental data on trends in youth attitudes and behavior, 1991-2015 (n=204,621).**

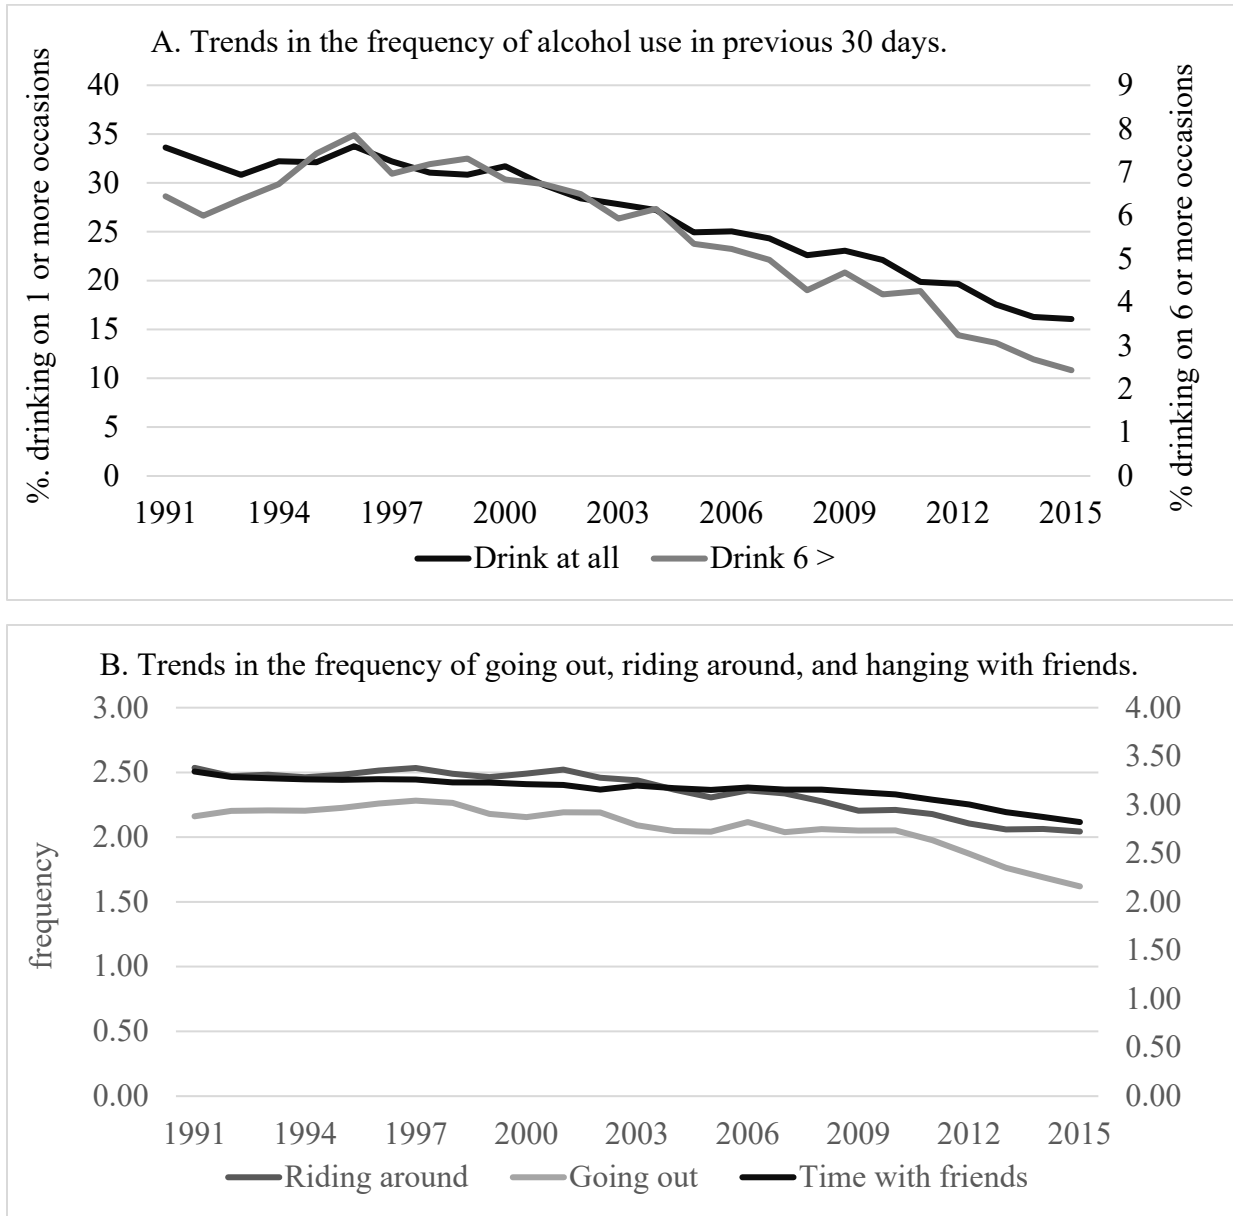

C. Trends in preference for doing risky and dangerous activities.

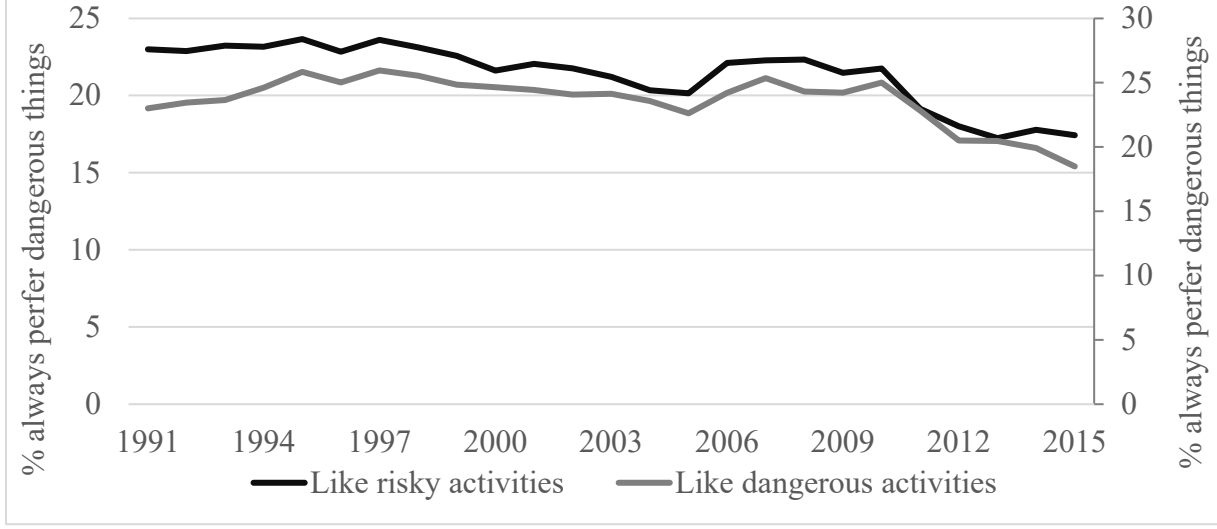

**Table S1. Logistic regression models of youth offending prevalence, with year fixed effects (n=204,621).**

|                                | <b>Model 1</b>      | <b>Model 2</b>      |
|--------------------------------|---------------------|---------------------|
| Grade                          | -.144 ***<br>(.009) | -.348 ***<br>(.010) |
| Black                          | .197 ***<br>(.016)  | .382 ***<br>(.017)  |
| Other                          | .206 ***<br>(.011)  | .311 ***<br>(.012)  |
| Sex                            | .509 ***<br>(.009)  | .320 ***<br>(.010)  |
| Single parent                  | .270 ***<br>(.011)  | .105 ***<br>(.012)  |
| Parental education             | -.077 ***<br>(.004) | -.023 ***<br>(.004) |
| Moderate work                  |                     | .175 ***<br>(.011)  |
| Intensive work                 |                     | .202 ***<br>(.025)  |
| Unstructured socializing       |                     | .102 ***<br>(.002)  |
| Alcohol frequency              |                     | .431 ***<br>(.006)  |
| College graduation expectation |                     | -.304 ***<br>(.018) |
| Community involvement          |                     | -.058 ***<br>(.005) |
| School attachment              |                     | -.256 ***<br>(.005) |
| Parental supervision           |                     | -.122 ***<br>(.004) |
| Sensation seeking              |                     | .751 ***<br>(.014)  |

\*  $p < .05$  \*\*  $p < .01$  \*\*\*  $p < .001$

Note: year dummies are included in the models, but the estimates are omitted from the table.

**Figure S2. Predicted probabilities of youth offending prevalence from logistic regression models with year fixed-effects, before and after considering explanatory variables (204,621).**

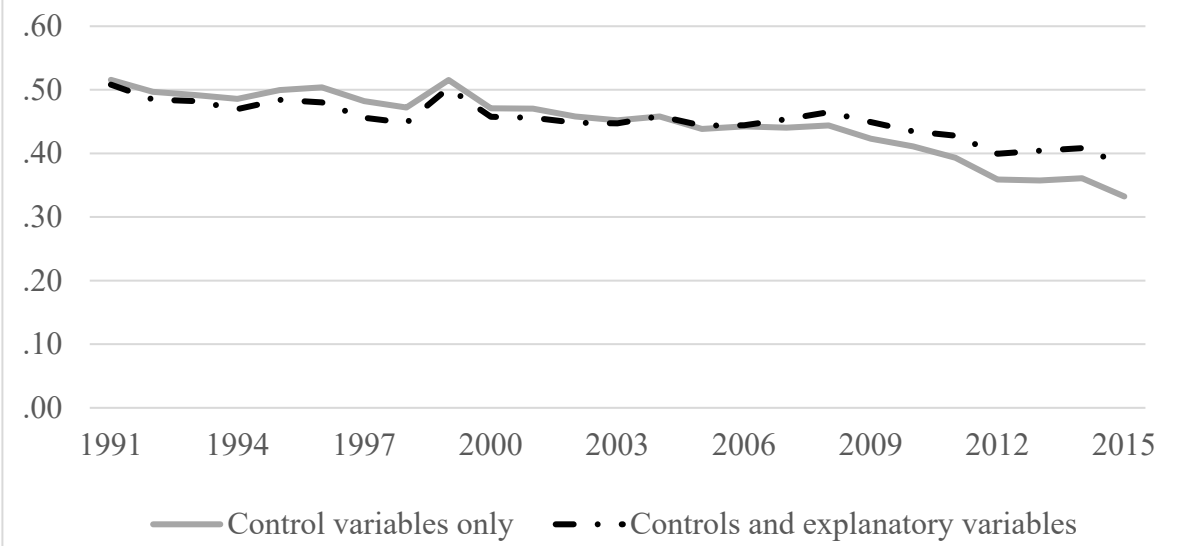

Q r h # r u # k h # s u g l f w r q v # k h # f r q w r e # d u b e d # z h # h # w r # k h l u # p s o # h d y # b g # k h #  
h { s o q d r u # d u b e d # z h # k r o g # f r q w d q w # k h l u # < < 4 # h d y # d x h # #

**Table S2. Multilevel random effects regression models of youth offending prevalence on multiply imputed dataset (n=304,326).**

|                                | <b>Model 1</b> |     | <b>Model 2</b> |     |
|--------------------------------|----------------|-----|----------------|-----|
| <i>Fixed Effects</i>           |                |     |                |     |
| Grade                          | -.080          | *** | -.175          | *** |
|                                | (.004)         |     | (.004)         |     |
| Black                          | .177           | *** | .336           | *** |
|                                | (.013)         |     | (.013)         |     |
| Other                          | .231           | *** | .334           | *** |
|                                | (.009)         |     | (.010)         |     |
| Sex                            | .471           | *** | .283           | *** |
|                                | (.008)         |     | (.009)         |     |
| Single parent                  | .265           | *** | .121           | *** |
|                                | (.011)         |     | (.013)         |     |
| Parental education             | -.072          | *** | -.022          | *** |
|                                | (.003)         |     | (.004)         |     |
| Moderate work                  |                |     | .176           | *** |
|                                |                |     | (.010)         |     |
| Intensive work                 |                |     | .197           | *** |
|                                |                |     | (.022)         |     |
| Unstructured socializing       |                |     | .107           | *** |
|                                |                |     | (.002)         |     |
| Alcohol frequency              |                |     | .422           | *** |
|                                |                |     | (.006)         |     |
| College graduation expectation |                |     | -.293          | *** |
|                                |                |     | (.016)         |     |
| Community involvement          |                |     | -.056          | *** |
|                                |                |     | (.004)         |     |
| School attachment              |                |     | -.244          | *** |
|                                |                |     | (.004)         |     |
| Parental supervision           |                |     | -.116          | *** |
|                                |                |     | (.003)         |     |
| Sensation seeking              |                |     | .725           | *** |
|                                |                |     | (.012)         |     |
| <i>Random Effects</i>          |                |     |                |     |
| Variance (Intercept)           | .039           |     | .012           |     |

\* $p < .05$  \*\* $p < .01$  \*\*\* $p < .001$

Note: Regressions estimated on all eligible sample respondents, with missing item responses estimated with multivariate imputation using chained equations. Ten imputations were performed prior to estimating models 1 and 2.

**Table S3. Multilevel random effects regression models of youth violence and property crime prevalence (n=204,621).**

|                                | Violence Prevalence |                     | Property Crime Prevalence |                     |
|--------------------------------|---------------------|---------------------|---------------------------|---------------------|
|                                | Model 1             | Model 2             | Model 1                   | Model 2             |
| <i>Fixed Effects</i>           |                     |                     |                           |                     |
| Grade                          | -.341 ***<br>(.010) | -.606 ***<br>(.011) | .026 ***<br>(.009)        | -.119 ***<br>(.010) |
| Black                          | .317 ***<br>(.017)  | .515 ***<br>(.018)  | -.117 **<br>(.016)        | .018<br>(.017)      |
| Other                          | .242 ***<br>(.012)  | .351 ***<br>(.012)  | .116 ***<br>(.011)        | .180 ***<br>(.012)  |
| Sex                            | .453 ***<br>(.010)  | .238 ***<br>(.011)  | .441 ***<br>(.009)        | .261 ***<br>(.010)  |
| Single parent                  | .265 ***<br>(.012)  | .100 ***<br>(.013)  | .213 ***<br>(.012)        | .055 ***<br>(.012)  |
| Parental education             | -.119 ***<br>(.004) | -.068 ***<br>(.004) | -.006<br>(.004)           | .044 ***<br>(.004)  |
| Moderate work                  |                     | .236 ***<br>(.011)  |                           | .102 ***<br>(.011)  |
| Intensive work                 |                     | .435 ***<br>(.025)  |                           | -.133 ***<br>(.025) |
| Unstructured socializing       |                     | .148 ***<br>(.003)  |                           | .076 ***<br>(.002)  |
| Alcohol frequency              |                     | .356 ***<br>(.006)  |                           | .360 ***<br>(.006)  |
| College graduation expectation |                     | -.380 ***<br>(.017) |                           | -.164 ***<br>(.017) |
| Community involvement          |                     | -.025 ***           |                           | -.070 ***           |

|                      |  |           |  |           |
|----------------------|--|-----------|--|-----------|
| School attachment    |  | (.006)    |  | (.005)    |
|                      |  | -.231 *** |  | -.240 *** |
| Parental supervision |  | (.006)    |  | (.005)    |
|                      |  | -.118 *** |  | -.123 *** |
| Sensation seeking    |  | (.004)    |  | (.004)    |
|                      |  | .636 ***  |  | .725 ***  |
|                      |  | (.014)    |  | (.013)    |

---

***Random Effects***

---

|                      |      |      |      |      |
|----------------------|------|------|------|------|
| Variance (Intercept) | .034 | .007 | .032 | .012 |
|----------------------|------|------|------|------|

---

\*  $p < .05$  \*\*  $p < .01$  \*\*\*  $p < .001$



**Figure S3. Predicted probabilities of youth violence and property crime prevalence before and after considering explanatory variables (n=204,621).**

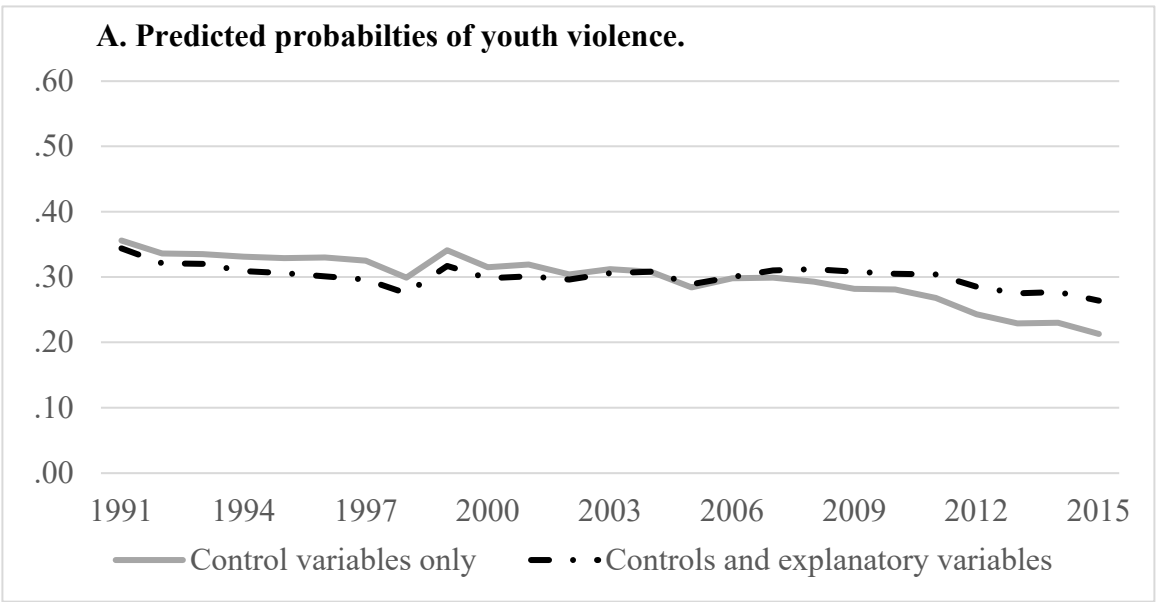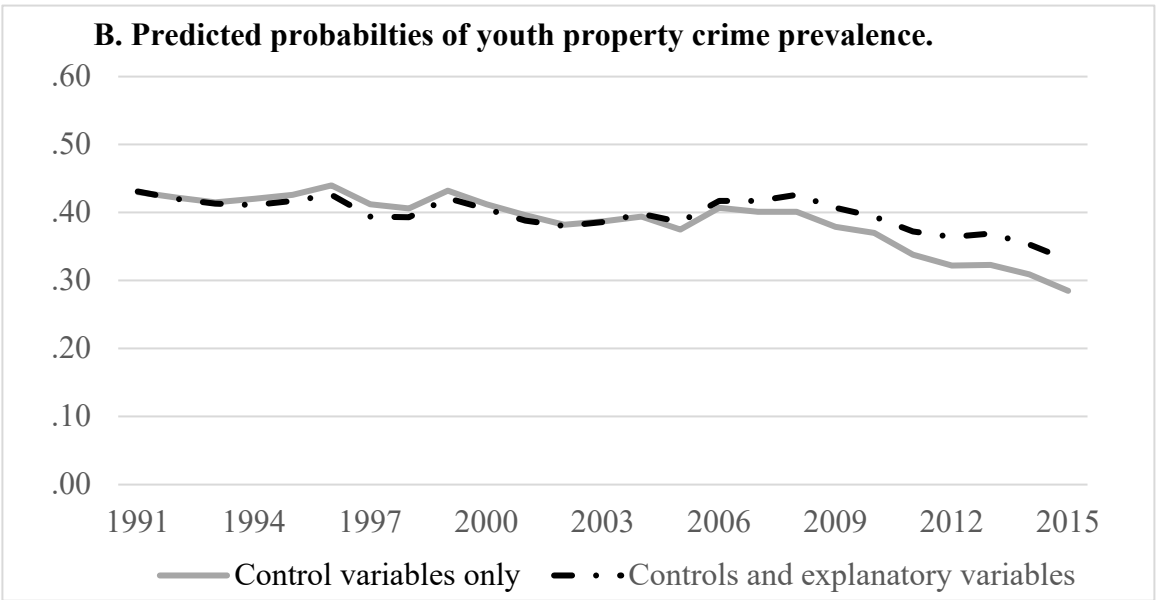

Note: For these predictions, the control variables were set to their sample means and the explanatory variables were held constant at their 1991 mean values.

**Table S4. Logistic regression models of youth offending prevalence for early 1990s and early 2010s subsample (n=90,711).**

|                                        | Violence Prevalence |                     | Property Crime Prevalence |                     |
|----------------------------------------|---------------------|---------------------|---------------------------|---------------------|
|                                        | Model 1             | Model 2             | Model 1                   | Model 2             |
| <i>Fixed Effects</i>                   |                     |                     |                           |                     |
| Survey years<br>(1=2011-15, 0=1991-95) | -.506 ***<br>(.006) | -.204 ***<br>(.009) | -.476 ***<br>(.003)       | -.274 ***<br>(.008) |
| Grade                                  | -.367 ***<br>(.040) | -.616 ***<br>(.048) | -.007<br>(.041)           | -.143 ***<br>(.035) |
| Black                                  | .312 ***<br>(.077)  | .464 ***<br>(.072)  | -.161 ***<br>(.053)       | -.056<br>(.0029)    |
| Other                                  | .280 ***<br>(.036)  | .374 ***<br>(.072)  | .128<br>(.070)            | .176<br>(.103)      |
| Sex                                    | .456 ***<br>(.092)  | .238 ***<br>(.048)  | .501 ***<br>(.159)        | .334 ***<br>(.113)  |
| Single parent                          | .262 ***<br>(.080)  | .094<br>(.094)      | .200 ***<br>(.023)        | .043<br>(.025)      |
| Parental education                     | -.114 ***<br>(.001) | -.069 ***<br>(.006) | .005<br>(.045)            | .046<br>(.053)      |
| Moderate work                          |                     | .234 ***<br>(.068)  |                           | .112 ***<br>(.002)  |
| Intensive work                         |                     | .434 ***<br>(.063)  |                           | -.153<br>(.085)     |
| Unstructured socializing               |                     | .151 ***<br>(.016)  |                           | .070 ***<br>(.008)  |
| Alcohol frequency                      |                     | .361 ***<br>(.005)  |                           | .384 ***<br>(.006)  |
| College graduation expectation         |                     | -.340 ***           |                           | -.103 ***           |

|                       |           |           |           |           |
|-----------------------|-----------|-----------|-----------|-----------|
| Community involvement |           | (.007)    |           | (.024)    |
|                       |           | -.019 *** |           | -.064 *** |
| School attachment     |           | (.005)    |           | (.019)    |
|                       |           | -.238 *** |           | -.250 *** |
| Parental supervision  |           | (.026)    |           | (.005)    |
|                       |           | -.105 *** |           | -.114 *** |
| Sensation seeking     |           | (.009)    |           | (.017)    |
|                       |           | .633 ***  |           | .728 ***  |
| Constant              |           | (.022)    |           | (.019)    |
|                       | -.340 *** | .407 ***  | -.622 *** | .097      |
|                       | (.003)    | (.062)    | (.299)    | (.259)    |

---

\*  $p < .05$  \*\*  $p < .01$  \*\*\*  $p < .001$

**Table S5. Decomposition of estimated association between survey period (early 1990s vs. early 2010s) and the prevalence of violence and property crime (n=90,711)**

**A. Rescaled parameter estimates for Survey Period (1=2011-15, 0=1991-95)**

|                                 | <u>Violence</u>    | <u>Property Crime</u> |
|---------------------------------|--------------------|-----------------------|
|                                 | <u>Coeff/SE</u>    | <u>Coeff/SE</u>       |
| Model 1 (controls only)         | -.546***<br>(.012) | -.513***<br>(.003)    |
| Model 2 (explanatory variables) | -.204***<br>(.009) | -.274***<br>(.008)    |

**B. KHB decomposition of coefficient reduction for Survey Period**

|                                | <u>Violence</u>         | <u>Property Crime</u>   |
|--------------------------------|-------------------------|-------------------------|
|                                | <u>Contribution</u>     | <u>Contribution</u>     |
| <b>Explanatory variables</b>   | <u>to Reduction (%)</u> | <u>to Reduction (%)</u> |
| Moderate work                  | 6.900                   | 3.520                   |
| Intensive work                 | 2.360                   | -.880                   |
| Unstructured socializing       | 24.460                  | 12.000                  |
| Alcohol frequency              | 18.420                  | 20.850                  |
| College graduation expectation | 2.710                   | .870                    |
| Community involvement          | .310                    | 1.110                   |
| School attachment              | -.880                   | -.980                   |
| Parental supervision           | 2.910                   | 3.380                   |
| Sensation seeking              | 5.510                   | 6.740                   |
